# Supplementary material
Source: PubMed Central journal article supplement (PMC7401937)
Supplement: NIHMS1604266-supplement-Figure_S1.pdf [file NIHMS1604266-supplement-Figure_S1.pdf]

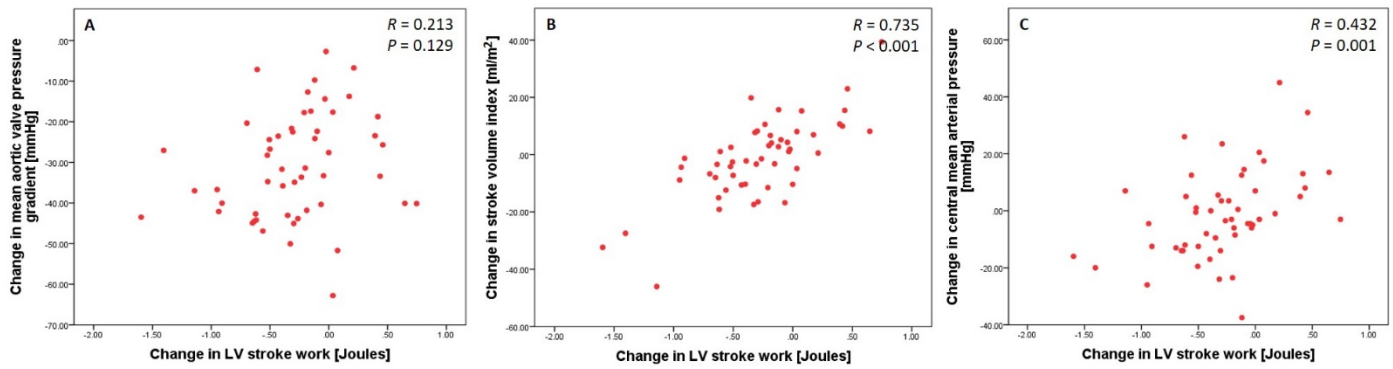

**Fig. S1. Properties of change in left ventricular stroke work (SW<sub>LV</sub>) from baseline to 30**

**days after TAVR.** Lack of correlation between change in SW<sub>LV</sub> from baseline to 30 days after TAVR with change in mean transvalvular pressure gradient (A). Evident of correlation between change in SW<sub>LV</sub> and change in stroke work index (B), as well with change in central mean aortic pressure (C).  $R$  represents the Pearson correlation coefficient; ( $n = 52$ ).
